# Supplementary material for: Shaping of inner ear sensory organs through antagonistic interactions between Notch signalling and Lmx1a
Source: eLife. 2017 Dec 4;6:e33323. doi: 10.7554/eLife.33323 (PMC5724992; doi:10.7554/eLife.33323)
Supplement: Figure 1—figure supplement 1—source data 1. [file elife-33323-fig1-figsupp1-data1.xlsx]

## Sheet: Sheet1
Embryonic stages (HH)	Area of ac (mm2)	Distance between ac and ut (mm)	Area of lc (mm2)	Distance between lc and ut (mm)	Sample ID
21/22	6763.02	14.39	0	0	19c
21/22	17706.9	34.62	0	0	31h
21/22	15686	23.52	0	0	32e
21/22	-	0	0	0	40h
21/22	4896.94	17.38	0	0	41d
21/22	7707.87	0	0	0	27h.1
21/22	12365.6	0	0	0	42a
21/22	10347.7	0	0	0	42e
23	10773.3	14.49	0	0	14a
23	8552.54	28.52	0	0	19g
23	20111	21.71	0	0	42b
23	24664.5	21.5	0	0	42c
23	14040.8	23.83	0	0	42f
23	17518	0	0	0	42g
25	8292.91	41.13	0	0	21g
25	28831	59.79	0	0	26c
25	30456.7	63.29	0	0	27b
25	33414.8	73.08	0	0	28c
25	47128.1	141.52	0	0	28d
25	31151.7	85.46	0	0	28g
25	59857.4	118.58	0	0	33f
25	21125.5	57.97	0	0	40a.1
25	35511.2	117.51	0	0	40e.1
25	33088.5	61.87	0	0	40e.2
25	29968.3	61.25	0	0	40f.1
25	36054.8	91.86	0	0	42d
25	34380.8	127.21	0	0	42h
25	49208.3	95.42	0	0	43a
25	24663.8	94.99	16796.1	0	27h.2
25	17184.3	74.47	-	0	27h.3
25	67395.9	164.12	65056.1	0	33b
25	31941.4	95.44	18035	0	33d
25	23783.7	84.94	24994	0	33g
25	14561.1	40.2	5277.31	0	33h
25	15053.3	45.63	0	0	40d.2
25	47361.8	105.24	31591	0	33c
25	66213.7	149.44	52162.2	0	33e
26	21373	44.95	0	0	16f
26	28464.4	86.12	0	0	26e
26	38093.5	105.07	16021.7	0	27d
26	24039.2	111.91	0	0	27f
26	23624.6	93.47	0	0	40c.1
26	32784.3	124.06	0	0	40c.2
26	10165.5	65.8	9506.21	0	20c
26	26593.8	135.83	18140.5	0	21e
26	34390.9	69.06	24085.2	0	26d
26	39494.2	104.91	24399.2	0	27g
26	39363.5	166.47	38823.4	45.29	36a
26	48595.6	202.62	43415	57.26	36b
26	51379.9	231.44	-	-	38b
27	39569.5	197.87	43978.3	46.3	26h
27	48691.5	147.52	41772.5	72.43	36f
27	41551.4	204	-	90.03	36g
27	-	-	49826.9	173.67	11a
27	43612.2	178.89	57726.3	57.1	28h
27	39517.9	189.76	55523.2	141.91	31g
27	55614.4	265.49	47805.7	83.03	32b
27	27885	193.92	-	-	39c
27	46021.6	253.36	55822.2	173.32	39d
27	45578.6	306.32	39031.3	179.62	39h
29	35820.6	274.19	50849	139.13	20g
29	41749.3	240.34	47850.5	106.78	31c
29	44589.2	264.31	-	331.46	31d
29	45519.2	266.25	-	128.29	32a
29	33498.8	190.51	-	-	32d
29	48475.9	221.26	67131	121	32g
30	35387.6	180.06	33346	75.14	26b
30	30765.8	228.49	39233.7	49.33	27c
30	61495.7	565.95	-	-	31b
30	59763.6	286.46	32403.6	94.29	32c
30	43449.7	335.88	-	-	32f
30	44623.2	335.35	-	-	32f
30	49777.3	314.97	47605.4	68.39	32h
